## OBSERVATIONS

# Paternally Inherited Proinsulin Mutations May Result in Earlier Onset of Monogenic Diabetes Mutation Identity Effect in Monogenic Diabetes

**M**utations within the human proinsulin gene (*INS*) have been reported to cause neonatal, maturity onset diabetes of the young (MODY), and antibody-negative idiopathic type 1 diabetes (1–3). However, because the expression of maternally or paternally transmitted *INS*-*IGF2* alleles is different as a result of selective methylation (imprinting) (4), we surmised that the effect of *INS* mutations may depend on the origin of the mutated allele.

To verify this hypothesis, pairs comprising an affected child and parent carrying the same heterozygous *INS* mutation were studied. A literature search was performed and yielded eight relevant articles reporting heterozygous *INS* mutations in neonatal, MODY, or antibody-negative type 1 diabetes (supplementary Table 1, available in an online appendix at <http://care.diabetesjournals.org/cgi/content/full/dc10-1142/DC1>). We also included an unpublished case (Pol52 in the Polish Registry of Neonatal Diabetes) with a Y50C mutation. The proband presented with diabetes during the 3rd day of life, whereas her father had been diagnosed at 7 years of age and treated as antibody-negative type 1 diabetes.

Altogether, 29 affected parent-child pairs were included from a total of 104 reported *INS* mutation cases. Of these 29 pairs, 16 (55%) of the children had inherited the mutated allele from their mother. In these maternally transmitted cases, 56% of the children developed neonatal diabetes compared with 85% in the paternally transmitted cases ( $P = 0.13$ ). Median age at diagnosis in child/mother pairs was 39.5 months (interquartile range 7.25–162) in children and 48 months (4.13–174) in their mothers. In child/father pairs, median age at diagnosis was 2.5 months (1.75–8.5) and 84 months (36–264), respectively. The difference in age at diagnosis between

children and parents was statistically significant for paternally transmitted mutations ( $P = 0.0003$ ) but not for maternally transmitted mutations ( $P = 0.82$ ). Children born with a mutated *INS* allele transmitted from their fathers did not, however, show statistically significant earlier onset than those with maternally transmitted mutations ( $P = 0.24$ ) due to correction for multiple hypothesis testing. Age at diagnosis of parents was similar ( $P = 0.89$ ).

Our analysis of the pooled data seemed to confirm the hypothesis of an allele-identity impact on the course of monogenic diabetes caused by heterozygous *INS* mutations. Maternal transmission of the mutated *INS* allele would then be associated with preferential silencing of the mutated allele, whereas paternal transmission would result in silencing of the functional maternal copy. Clinically, this effect would be manifested in a gap of age at diagnosis between children and their fathers, at least when the father himself has acquired the mutation de novo or inherited it from his mother.

*INS* mutation results in impaired insulin secretion, disturbed intracellular trafficking, and endoplasmic reticulum stress (5), and the presence of different mutations could explain between-patient differences in age at diagnosis. However, this would not influence the impact of parental allele inheritance because the biological effect of the mutation should be the same in both generations. We therefore conclude that genetic imprinting of the *INS*-*IGF2* region seems to be a likely explanation of the reported differences in age at onset of monogenic diabetes caused by *INS* mutations. This observation could be used for selection of genes for screening in patients suspected of having monogenic forms of diabetes.

WOJCIECH FENDLER, MD<sup>1</sup>

MACIEJ BOROWIEC, MD, PHD<sup>1</sup>

KAROLINA ANTOSIK, MSC<sup>1</sup>

BEATA JAROSZEWSKA-SWIATEK, MD<sup>2</sup>

EWA SZWALKIEWICZ-WAROWICKA, MD<sup>2</sup>

MACIEJ MALECKI, MD, PHD<sup>3</sup>

MALGORZATA MYSLIWIEC, MD, PHD<sup>4</sup>

WOJCIECH MLYNARSKI, MD, PHD<sup>1</sup>

From the <sup>1</sup>Department of Pediatrics, Oncology, Hematology and Diabetology, Medical University of Lodz, Lodz, Poland; the <sup>2</sup>Department of Neonatology, Neonatal Pathology and Congenital Malformations, Regional Pediatric Specialist Hospital, Olsztyn, Poland; the <sup>3</sup>Department of Metabolic Diseases, Collegium Medicum Jagiellonian University of Cracow, Krakow, Poland; and the <sup>4</sup>Department of Pediatrics, Hematology, Oncol-

ogy and Endocrinology, Medical University of Gdansk, Gdansk, Poland.

Corresponding author: Wojciech Mlynarski, wojciech.mlynarski@umed.lodz.pl.

DOI: 10.2337/dc10-1142

© 2011 by the American Diabetes Association.

Readers may use this article as long as the work is properly cited, the use is educational and not for profit, and the work is not altered. See <http://creativecommons.org/licenses/by-nc-nd/3.0/> for details.

**Acknowledgments**— The study was funded from the “Polish Registry for Pediatric and Adolescent Diabetes–Nationwide Genetic Screening for Monogenic Diabetes” of the Innovative Economy Operational Program.

No potential conflicts of interest relevant to this article were reported.

Parts of this study were presented in poster form at the 70th Scientific Sessions of the American Diabetes Association, Orlando, Florida, 25–29 June 2010.

## References

1. Støy J, Edghill EL, Flanagan SE, Ye H, Paz VP, Pluzhnikov A, Below JE, Hayes MG, Cox NJ, Lipkind GM, Lipton RB, Greeley SA, Patch AM, Ellard S, Steiner DF, Hattersley AT, Philipson LH, Bell GI, Neonatal Diabetes International Collaborative Group. Insulin gene mutations as a cause of permanent neonatal diabetes. *Proc Natl Acad Sci U S A* 2007;104:15040–15044
2. Molven A, Ringdal M, Nordbø AM, Raeder H, Støy J, Lipkind GM, Steiner DF, Philipson LH, Bergmann I, Aarskog D, Undlien DE, Joner G, Søvik O, Norwegian Childhood Diabetes Study Group, Bell GI, Njolstad PR. Mutations in the insulin gene can cause MODY and autoantibody-negative type 1 diabetes. *Diabetes* 2008;57:1131–1135
3. Edghill EL, Flanagan SE, Patch AM, Boustred C, Parrish A, Shields B, Shepherd MH, Hussain K, Kapoor RR, Malecki M, MacDonald MJ, Støy J, Steiner DF, Philipson LH, Bell GI, Neonatal Diabetes International Collaborative Group, Hattersley AT, Ellard S. Insulin mutation screening in 1,044 patients with diabetes: mutations in the *INS* gene are a common cause of neonatal diabetes but a rare cause of diabetes diagnosed in childhood or adulthood. *Diabetes* 2008;57:1034–1042
4. Tager H, Given B, Baldwin D, Mako M, Markese J, Rubenstein A, Olefsky J, Kobayashi M, Kolterman O, Poucher R. A structurally abnormal insulin causing human diabetes. *Nature* 1979;281:122–125
5. Rajan S, Eames SC, Park SY, Labno C, Bell GI, Prince VE, Philipson LH. In vitro processing and secretion of mutant insulin proteins that cause permanent neonatal diabetes. *Am J Physiol Endocrinol Metab* 2010;298:E403–E410
